# Supplementary material for: Antioxidant, Anti-Inflammatory, and Anti-Diabetic Activity of Phenolic Acids Fractions Obtained from Aerva lanata (L.) Juss
Source: MDPI journal article supplement (doi:10.3390/molecules26123486), 2021-06-08
Supplement: s1 [file s1]

## Supplementary materials

### Antioxidant, anti-inflammatory, and anti-diabetic activity of phenolic acids fractions obtained from *Aerva lanata* (L.) Juss.

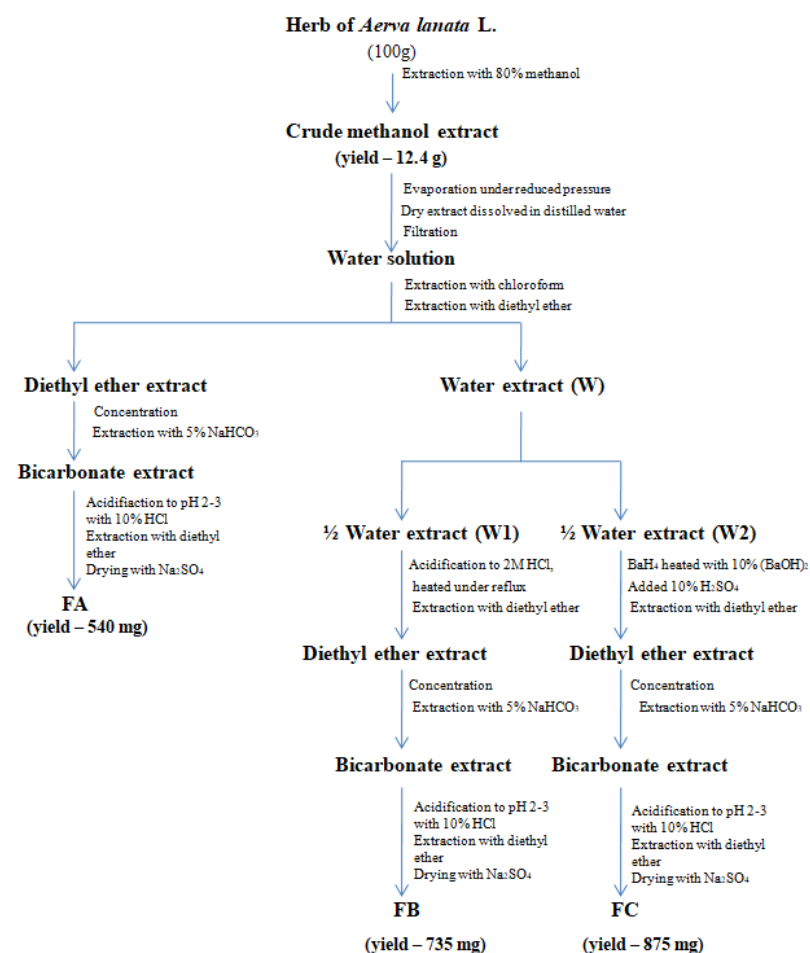

**Figure S1:** Scheme of extraction of phenolic acids from fractions obtained from *Aerva lanata* L.

**Table S1:** LC-ESI-MS/MS analytical results of phenolic acids investigated in samples. Compounds were confirmed by comparison with authentic standards

| Compound                  | Retention time<br>[min] | [M-H] <sup>-</sup><br>[m/z] | Fragment ions<br>[m/z] | Collision energy<br>[eV] |
|---------------------------|-------------------------|-----------------------------|------------------------|--------------------------|
| Gallic acid               | 5.00                    | 168.7                       | 78.9                   | -36                      |
|                           |                         |                             | 124.9                  | -14                      |
| Homogentisic acid         | 5.27                    | 166.8                       | 123                    | -12                      |
|                           |                         |                             | 108                    | -36                      |
| $\alpha$ -resorcylic acid | 5.82                    | 152.8                       | 109                    | -12                      |
|                           |                         |                             | 64.9                   | -20                      |
| Protocatechuic acid       | 5.85                    | 152.9                       | 80.9                   | -26                      |
|                           |                         |                             | 107.8                  | -38                      |

|                           |       |       |       |      |
|---------------------------|-------|-------|-------|------|
| Caffeic acid              | 6.70  | 178.7 | 88.9  | -46  |
|                           |       |       | 134.9 | -16  |
| Syringic acid             | 7.14  | 196.9 | 122.8 | -24  |
|                           |       |       | 181.9 | -12  |
| 4-hydroxybenzoic acid     | 7.27  | 136.8 | 92.9  | -18  |
| Vanillic acid             | 7.46  | 166.8 | 107.9 | -18  |
|                           |       |       | 123   | -12  |
| Gentisic acid             | 7.72  | 352.9 | 80    | -110 |
|                           |       |       | 96.9  | -52  |
| $\gamma$ -Resorcylic acid | 7.90  | 152.8 | 108.9 | -14  |
|                           |       |       | 65    | -30  |
| 3-hydroxybenzoic acid     | 8.08  | 136.9 | 93    | -16  |
|                           |       |       | 75    | -48  |
| $\beta$ -Resorcylic acid  | 8.92  | 152.8 | 108.9 | -12  |
|                           |       |       | 65    | -24  |
| Sinapic acid              | 9.19  | 222.8 | 121   | -36  |
|                           |       |       | 148.9 | -20  |
| p-Coumaric acid           | 9.28  | 162.8 | 93    | -44  |
|                           |       |       | 119   | -14  |
| Ferulic acid              | 9.84  | 192.8 | 133.9 | -16  |
|                           |       |       | 177.9 | -12  |
| Rosmarinic acid           | 10.18 | 358.7 | 132.6 | -44  |
|                           |       |       | 160.8 | -20  |
| Isoferulic acid           | 10.49 | 192.8 | 133.9 | -16  |
|                           |       |       | 177.9 | -12  |
| m-Coumaric acid           | 10.69 | 162.8 | 91    | -36  |
|                           |       |       | 119   | -14  |
| Veratric acid             | 10.80 | 180.7 | 121.9 | -18  |
|                           |       |       | 136.9 | -12  |
| o-Coumaric acid           | 11.87 | 162.8 | 119   | -14  |
|                           |       |       | 93    | -46  |
| Salicylic acid            | 14.16 | 136.9 | 75    | -48  |
|                           |       |       | 93    | -16  |

**Table S2:** Limit of detection (LOD), limit of quantification (LOQ), and calibration curve parameters for phenolic acids

| Compound                  | LOD<br>[ng/mL] | LOQ<br>[ng/mL] | R <sup>2</sup> | Linearity range<br>[ng/mL] |
|---------------------------|----------------|----------------|----------------|----------------------------|
| Gallic acid               | 47.5           | 95             | 0.9980         | 190-3300                   |
| Homogentisic acid         | 34             | 68             | 0.9995         | 136-11100                  |
| Protocatechuic acid       | 17             | 34             | 0.9992         | 68-3470                    |
| $\alpha$ -Resorcylic acid | 174            | 347            | 0.9990         | 347-3470                   |
| Caffeic acid              | 40             | 160            | 0.9990         | 320-3500                   |
| Syringic acid             | 166            | 666            | 0.9985         | 666-11100                  |

|                           |      |      |        |            |
|---------------------------|------|------|--------|------------|
| 4-hydroxybenzoic acid     | 17   | 34.7 | 0.9984 | 104.1-3470 |
| Vanillic acid             | 125  | 250  | 0.9987 | 500-33000  |
| Gentisic acid             | 1.6  | 3.3  | 0.9991 | 3.3-330    |
| $\gamma$ -Resorcylic acid | 40   | 200  | 0.9982 | 200-7000   |
| 3-hydroxybenzoic acid     | 84   | 167  | 0.9985 | 334-6670   |
| $\beta$ -Resorcylic acid  | 50   | 100  | 0.9992 | 200-2000   |
| Sinapic acid              | 17.4 | 69.4 | 0.9991 | 138.8-3470 |
| <i>p</i> -Coumaric acid   | 7.3  | 18.1 | 0.9991 | 36.2-1820  |
| Ferulic acid              | 17.4 | 34.7 | 0.9991 | 69.4-11600 |
| Rosmarinic acid           | 7.1  | 17.9 | 0.9990 | 35.8-7140  |
| Isoferulic acid           | 19   | 686  | 0.9985 | 686-11400  |
| <i>m</i> -Coumaric acid   | 17   | 136  | 0.9987 | 174-17000  |
| Veratric acid             | 1570 | 3140 | 0.9985 | 3140-31400 |
| <i>o</i> -Coumaric acid   | 7.3  | 21.9 | 0.9991 | 21.9-1820  |
| Salicylic acid            | 8.3  | 16.5 | 0.9985 | 16.5-1650  |
